# Supplementary material
Source: publisher site journal article supplement (http://www.spandidos-publications.com/4462/downloadSupplementary)

Figure S1. Expression distribution of Yippe-like genes in human normal organ tissues by using GTEx database. (A) YPEL1, (B) YPEL2, (C) YPEL3, (D) YPEL4 and (E) YPEL5.

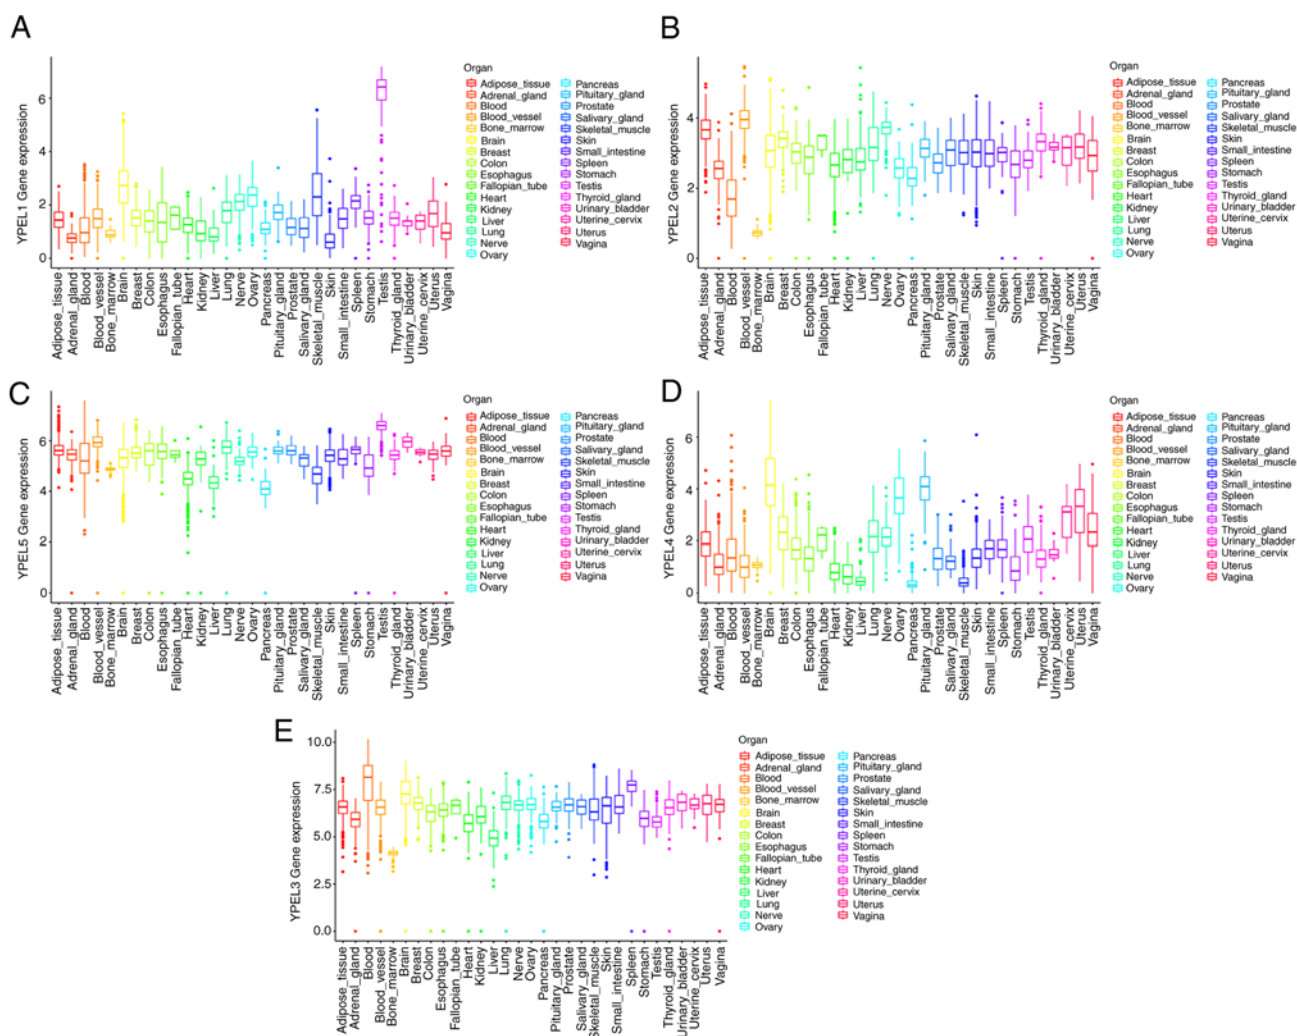

Figure S2. The expression of YPEL1, YPEL2 and YPEL5 in the tumor and paired adjacent tissues was detected by reverse transcription-quantitative PCR. \* $P < 0.05$ , \*\* $P < 0.01$  and \*\*\* $P < 0.001$ . YPEL, Yippee-like.

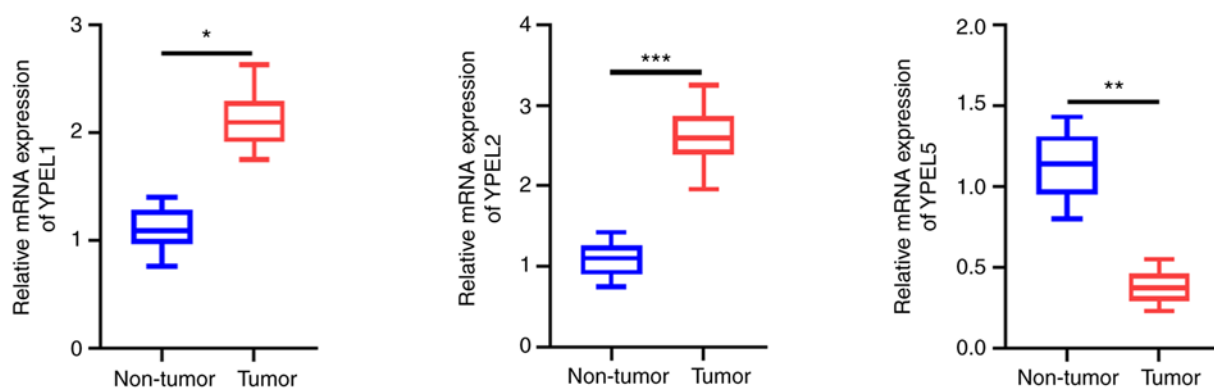

Supplement: Supplementary file 1 [file downloadSupplementary]
